# Supplementary material for: Mitochondrial Targeting of Metformin Enhances Its Activity against Pancreatic Cancer
Source: Oxford University Press journal article supplement (doi:10.1158/1535-7163.mct-15-1021), 2016-10-07
Supplement: 15357163mct151021-sup-160318_2_supp_3643455_wcjcbb.docx [file 15357163mct151021-sup-160318_2_supp_3643455_wcjcbb.docx]

**Legends to supplementary tables**

**Table S1**

Plate format and number of seeded cells for the experiments presented in the study (CV – Crystal Violet Assay, xCell – Impedance based assay, ROS – detection of reactive oxygen species).

**Table S2**

IC50 values for metformin and norMitoMet for a panel of pancreatic cancer cell lines and non-malignant BJ fibroblasts determined by the crystal violet assay (CV) or the RTCA xCelligence system (xCell). Cells were treated with the compounds for 24 or 48 h. AsPC-1 cell line was excluded from the xCelligence assay as it was found to be unsuitable for impedance-based measurements. Data are represented as mean ± S.E.M.
