# Supplementary material for: Mitochondrial Targeting of Metformin Enhances Its Activity against Pancreatic Cancer
Source: Oxford University Press journal article supplement (doi:10.1158/1535-7163.mct-15-1021), 2016-10-07
Supplement: 15357163mct151021-sup-160318_2_supp_3643457_jcjcbb.doc [file 15357163mct151021-sup-160318_2_supp_3643457_jcjcbb.doc]

**Supplementary methods**

**Synthesis of mitochondrially targeted metformin (MitoMet)**

General materials and methods

Unless noted, commercially available reagents were used as purchased from Sigma-Aldrich without further purification. Reaction progress was monitored by thin layer chromatography (TLC) on aluminum backed silica gel plates, visualized with UV and ninhydrine stain. Flash chromatography was performed using silica gel (60-200 mesh). Solvents for chromatography were AR grade. NMR spectra were acquired on a 500 MHz or 400 MHz instruments. 1H NMR spectra were referenced to the residual forms of the solvent with one less deuterium than the perdeuterated solvent (Methanol-d4 = 3.31 ppm). Splitting patterns are designated as s, singlet; d, doublet; t, triplet; q, quartet; p, pentet; m, multiplet. All chemical shifts values are reported in ppm and coupling constants (J) are reported in Hz. 13C NMR spectra were referenced to the internal perdeuterated solvent resonance (Methanol-d4 = 49.00 ppm). IR spectra were recorded with a Bruker EQUINOX 55 (IFS 55) spectrometer in KBr pellets. High resolution mass spectra were measured on a LTQ Orbitrap XL (Thermo Fischer Scientific) spectrometer using ESI ionization technique.

Synthesis

Scheme 1

All mitochondrially targeted biguanidines were prepared *via* the same general procedure from symmetrical dibromo alkanes (scheme 1). Appreciable desymetrization of the starting 1,6- dibromohexane and 1,10-dibromodecane was achieved by alkylation of triphenylphosphine with excess (~ 6:1) of corresponding dibromides at 90°C in DMF. However, up to 5% of related bisphosphonium impurity (not shown) was necessary to separate by column chromatography. General yield of this desymetrization step was surprisingly high (~ 90%) which can be attributed not only to the excess of the starting dibromide but also to its poor solubility, thus lower reactivity of the desired monosubstituded phosphonium bromides **1** and **2** under used reaction conditions. Compounds **1** and **2** were purified after precipitation from the reaction mixture by column chromatography with 92% and 53% yield, respectively. Both phosphonium bromides **1** and **2** were reacted with either ammonia or methylamine, followed by acidification with hydrochloric acid and filtration through ion exchange resin in the Cl- cycle and transformed to hydrochlorides of either primary amines **3** and **4** or to secondary amines **5** and **6**. Yields of these biologically more suitable phosphonium chlorides varied considerably and, in most cases, complicated column chromatography was needed to separate the byproducts of the reaction. The only exception was hydrochloride **5,** which was isolated with a rather unexpected 95% yield, whereas the yields for the other derivatives **3** (63%), **4** (40%) and **6** (61%) were moderate. The final step of the synthesis was addition of hydrochlorides **3**, **4**, **5** and **6** to excess of dicyanodiamide at 160°C in DMF. The reaction mixture was purified by chromatography, where substantial amount of mass was lost in “mixed” fractions, and the yields of pure products **7** (31%), **8** (40%), **9** (26%) and **10** (25%) were rather poor. Although, the yields in the last step were then not optimized, the synthesis still allowed for preparation mitochondially targeted biguanides at a multigram scale. Furthermore, our mode of synthesis enabled wide screening of various amines and linkers (not shown) to perform a structure-activity relationship study, which will be subject of a subsequent publication.

**(10-bromodecyl)triphenylphosphonium bromide (1).** 1,10-Dibromodecane (5,72 g, 19,063 mmol) and triphenylphosphine (1 g, 3,813 mmol) were dissolved in DMF (5 ml) and the mixture was heated for 90 °C for 12 h. The reaction mixture was cooled to room temperature, dissolved in minimal amount of dichloromethane (5 ml) and added drop-wise to cold (4°C) diethyether (200 ml). The oily precipitate was decanted and filtered, and the concentrate was purified using column chromatography on silicagel (chloroform/methanol gradient 0-10%) to obtain the desired product in the form of light yellow oil (1,98 g, 92 %).

1H NMR (401 MHz, Methanol-d4) δ 8.03 – 7.64 (m, 15H), 3.50 – 3.36 (m, 4H), 1.84 (p, J = 14.4, 6.8 Hz, 2H), 1.79 – 1.63 (m, 2H), 1.63 – 1.52 (m, 2H), 1.50 – 1.22 (m, 10H).

13C NMR (101 MHz, Methanol-d4) δ 134.87 (d, J = 3.0 Hz), 133.43 (d, J = 10.0 Hz), 130.13 (d, J = 12.5 Hz), 118.62 (d, J = 86.3 Hz), 33.14, 32.54, 30.17 (d, J = 16.1 Hz), 28.93, 28.83, 28.43, 28.33, 27.69, 22.13 (d, J = 4.4 Hz), 21.29 (d, J = 51.0 Hz).

IR (KBr pellet): ν=3052, 3006, 2988, 2926, 2853, 2792, 1918, 1830, 1617, 1587, 1485, 1465, 1438, 1338, 1317, 1251, 1189, 1161, 1113, 996, 750, 723, 691.

HRMS calculated for C28H35BrP 481.16543 and 483.16338, found: 481.16534 and 483.16318.

**(1-bromohexyl)triphenylphosphonium bromide (2)** was prepared in the yield of 53% using the same procedure described for compound 1.

1H NMR (401 MHz, Methanol-d4) δ 7.96 – 7.74 (m, 15H), 3.52 – 3.39 (m, 4H), 1.83 (p, J = 6.8 Hz, 2H), 1.78 – 1.67 (m, 2H), 1.67 – 1.56 (m, 2H), 1.56 – 1.45 (m, 2H).

13C NMR (101 MHz, Methanol-d4) δ 134.88 (d, J = 3.0 Hz), 133.45 (d, J = 10.0 Hz), 130.16 (d, J = 12.6 Hz), 118.56 (d, J = 86.3 Hz), 32.75, 32.18, 29.29 (d, J = 16.4 Hz), 27.00, 22.04 (d, J = 4.3 Hz), 21.28 (d, J = 51.2 Hz).

IR (KBr pellet): ν= 3053, 3040, 3005, 2990, 2938, 2860, 2796, 2212, 2006, 1931, 1821, 1685, 1610, 1587, 1575, 1483, 1459, 1435, 1333, 1252, 1186, 1110, 995, 786, 751, 722, 692.

HRMS calculated for C24H27BrP: 425.10283 and 427.10078, found: 425.10279 and 427.10061.

**(10-aminodecyl) triphenylphosphonium chloride hydrochloride (3)** (10-bromodecyl)triphenylphosphonium bromid (9,26 g, 16,448 mmol) was dissolved in 7N solution of ammonia in methanol (60 ml) and the reaction mixture was stirred at 50 ºC. After 6 h, additional ammonia in methanol (40 ml) was added and the reaction mixture heated for additional 24 h at 50 ºC. The reaction mixture was concentrated under reduced presure, and the crude product was purified using column chromatography on silicagel (chloroform/methanol gradient 0-10%). The product was acidified with HCl (36%, 5 ml) and filtered through Dowex 1x8 in chloride form (50 g) to obtain the desired product (5,135 g, 63%).

1H NMR (500 MHz, Methanol-d4) δ 7.92 – 7.85 (m, 3H), 7.85 – 7.68 (m, 12H), 3.46 – 3.37 (m, 2H), 2.90 (t, J = 7.5 Hz, 2H), 1.72 – 1.60 (m, 4H), 1.56 (p, J = 7.5 Hz, 2H), 1.43 – 1.20 (m, 12H);

13C NMR (126 MHz, Methanol-d4) δ 136.23 (d, J = 3.0 Hz), 134.79 (d, J = 9.9 Hz), 131.51 (d, J = 12.5 Hz), 120.00 (d, J = 86.3 Hz), 40.76, 31.59 (d, J = 16.2 Hz), 30.29 (2C), 30.12, 29.89, 28.53, 27.42, 23.57 (d, J = 4.4 Hz), 22.68 (d, J = 51.1 Hz).

IR (KBr pellet): ν=3051, 3007, 2927, 2854, 2006, 1825, 1601, 1587, 1485, 1465, 1438, 1402, 1337, 1318, 1189, 1161, 1113, 996, 751, 723, 691.

HRMS calculated for C28H37NP: 418.26581, found: 418.26567.

**(6-aminohexyl) triphenylphosphonium chloride hydrochloride (4)** was prepared with the yield of 40% using the same procedure described for compound 3.

1H NMR (401 MHz, Methanol-d4) δ 8.01 – 7.65 (m, 15H), 3.59 – 3.45 (m, 2H), 3.37 (s, 1H, NHD), 2.96 (t, J = 7.5 Hz, deuterium coupling, J = 28.0 Hz, 2H), 1.81 – 1.59 (m, 6H), 1.48 (p, J = 6.8 Hz, 2H).

13C NMR (101 MHz, Methanol-d4) δ 134.86 (d, J = 3.0 Hz), 133.50 (d, J = 10.0 Hz), 130.17 (d, J = 12.6 Hz), 118.56 (d, J = 86.4 Hz), 39.20, 29.59 (d, J = 16.7 Hz), 26.85, 25.32, 22.03 (d, J = 4.2 Hz), 21.35 (d, J = 51.3 Hz).

IR (KBr pellet): ν=3410, 2935, 2864, 2616, 2521, 2008, 1830, 1600, 1586, 1484, 1463, 1437, 1337, 1317, 1187, 1161, 1113, 1026, 996,940, 749, 723, 690.

HRMS calculated for C24H29NP: 362.20321, found: 362.20325.

**(10-((methylamino)decyl)triphenylphosphonium chloride hydrochloride (5)** (10-bromodecyl)triphenylphosphonium bromid (562 mg,1 mmol) was dissolved in 2M solution of methylamine in methanol (60 ml) and the reaction mixture was stirred at 50 ºC for 24 h. The mixture was concentrated under reduced pressure and the crude product purified using column chromatography on silicagel (chloroform/methanol gradient 0-10%). The product was acidified with HCl and filtered through Dowex 1x8 in chloride form to obtain the desired product (485 mg, 95%).

1H NMR (401 MHz, Methanol-d4) δ 8.01 – 7.69 (m, 15H), 3.52 – 3.40 (m, 2H), 3.01 (t, J = 7.7 Hz, 2H), 2.72 (s, 3H), 1.78 – 1.64 (m, 4H), 1.59 (p, J = 6.7 Hz, 2H), 1.46 – 1.24 (m, 10H).

13C NMR (101 MHz, Methanol-d4) δ 134.85 (d, J = 3.0 Hz), 133.46 (d, J = 10.0 Hz), 130.15 (d, J = 12.5 Hz), 118.63 (d, J = 86.3 Hz), 49.07, 32.29, 30.20 (d, J = 16.1 Hz), 28.87, 28.85, 28.70, 28.49, 28.49, 22.20 (d, J = 4.4 Hz), 21.34 (d, J = 50.9 Hz).

IR (KBr pellet): ν=3360, 3052, 3008, 2932, 2920, 2852, 2779, 2756, 2729, 2513, 2554, 2410, 2378, 2009, 1934, 1905, 1825, 1778, 1715, 1616, 1586, 1554, 1480, 1469, 1437, 1411, 1318, 1190, 1161, 1113, 1035, 997, 959, 866, 768, 753, 739, 725, 713, 692.

HRMS calculated for C29H39NP: 432.28146, found:432.28135.

**((6-methylamino)hexyl) triphenylphosphonium chloride hydrochloride** **(6)** was prepared with the yield of 61% using the same procedure described for compound 5.

1H NMR (401 MHz, Methanol-d4) δ 8.00 – 7.57 (m, 15H), 3.58 – 3.44 (m, 2H), 3.02 (t, J = 7.6 Hz, 2H), 2.71 (s, 3H), 1.82 – 1.58 (m, 6H), 1.48 (p, J = 6.8 Hz, 2H).

13C NMR (101 MHz, Methanol-d4) δ 134.87 (d, J = 3.0 Hz), 133.50 (d, J = 10.0 Hz), 130.17 (d, J = 12.6 Hz), 118.55 (d, J = 86.4 Hz), 48.81, 32.29, 29.51 (d, J = 16.7 Hz), 25.44, 25.28, 21.97 (d, J = 4.2 Hz), 21.32 (d, J = 51.3 Hz).

IR (KBr pellet): ν= 3409, 3051, 3007, 2935, 2864, 2739, 2417, 2215, 2002, 1924, 1832, 1783, 1614, 1586, 1484, 1462, 1438, 1318, 1189, 1162, 1113, 996, 751, 723, 691.

HRMS calculated for C25H31NP: 376.21886, found: 376.21889.

**(10-(3-carbamimidoylguanidino)decyl)triphenylphosphonium chloride hydrochloride (7)**

(10-aminodecyl) triphenylphosphonium chloride hydrochloride (973 mg, 1,983 mmol) and dicyandiamide (750 mg, 8,922 mmol) was dissolved in DMF (5 ml) and refluxed under constant stirring for 6 h at 160 ºC. The reaction mixture was concentrated and the crude material purified using column chromatography on silicagel (chloroform/methanol gradient
0-20%) to obtain the desired biguanide derivative (352 mg, 31 %).

1H NMR (500 MHz, Methanol-d4) δ 7.92 – 7.85 (m, 3H), 7.83 – 7.72 (m, 12H), 3.45 – 3.36 (m, 2H), 3.18 (t, J = 7.1 Hz, 2H), 1.70 – 1.60 (m, 2H), 1.58 – 1.48 (m, 4H), 1.37 – 1.22 (m, 12H);

13C NMR (126 MHz, Methanol-d4) δ 159.89, 159.39, 134.85, 133.40 (d, J = 8.8 Hz), 130.01 (d, J = 12.0 Hz), 118.65 (d, J = 86.4 Hz), 41.24, 30.21(d, J = 15.85 Hz), 29.31, 29.09, 28.97(2C), 28.52, 26.47, 22.17, 21.30 (d, J = 50.6 Hz).

IR (KBr pellet): ν=3162, 2926, 2854, 1635, 1554, 1508, 1486, 1466, 1438, 1399, 1334, 1190, 1163, 1113, 996, 794, 723, 691.

HRMS calculated for C30H41N5P: 502.30941, found: 502.30942.

**(6-(3-carbamimidoylguanidino)hexyl) triphenylphosphonium chloride hydrochloride** (**8)** was prepared with the yield of 40% using the same procedure described for compound 7.

1H NMR (401 MHz, Methanol-d4) δ 8.03 – 7.65 (m, 15H), 3.59 – 3.42 (m, 2H), 3.22 (t, J = 6.9 Hz, 3H), 1.77 – 1.67 (m, 2H), 1.68 – 1.59 (m, 2H), 1.59 – 1.51 (m, 2H), 1.48 – 1.38 (m, 2H).

13C NMR (101 MHz, Methanol-d4) δ 159.84, 158.92, 134.87 (d, J = 3.0 Hz), 133.45 (d, J = 10.0 Hz), 130.16 (d, J = 12.6 Hz), 118.60 (d, J = 86.3 Hz), 29.80 (d, J = 16.4 Hz), 25.67 (3C), 22.12 (d, J = 4.3 Hz), 21.26 (d, J = 51.1 Hz).

IR (KBr pellet): ν=3315, 3180, 3052, 2935, 3861, 2804, 1690, 1631, 1587, 1559, 1503, 1438, 1113, 996, 750, 723, 691.

HRMS calculated for C26H33N5P: 446.24681, found: 446.24679.

**(10-(3-carbamimidoyl-1-methylguanidino)decyl)triphenylphosphonium chloride hydrochloride (9)** (10-((methylamino)decyl)triphenylphosphonium chloride (422 mg, 0.836 mmol) and dicyandiamide (140 mg, 1.665 mmol) was dissolved in DMF (5 ml) and refluxed under constant stirring for 8 h at 160 ºC. Th reaction mixture was concentrated and the crude material purified using column chromatography on silicagel (chloroform/methanol gradient 0-20%) to obtain desired biguanide derivative **9** (113 mg, 26 %).

1H NMR (400 MHz, Methanol-d4) δ 8.08 – 7.62 (m, 15H), 3.49 – 3.39 (m, 4H), 3.03 (s, 3H), 1.74 – 1.64 (m, 2H), 1.64 – 1.52 (m, 4H), 1.43 – 1.24 (m, 10H).

13C NMR (101 MHz, Methanol-d4) δ 159.33, 158.85, 134.86 (d, J = 3.0 Hz), 133.43 (d, J = 10.0 Hz), 130.14 (d, J = 12.5 Hz), 118.63 (d, J = 86.3 Hz), 49.95, 34.68, 30.24 (d, J = 16.1 Hz), 29.12 , 29.03, 29.01, 28.56, 27.09, 26.23, 22.20 (d, J = 4.4 Hz), 21.28 (d, J = 51.0 Hz).

IR (KBr pellet): ν=3318, 3183, 3057, 2925, 2854, 1629, 1559, 1496, 1465, 1438, 1419, 1365, 1325, 1113, 1048, 996, 752, 723, 692.

HRMS calculated for C31H43N5P: 516.32506, found: 516.32498.

**(6-(3-carbamimidoyl-1-methylguanidino)hexyl) triphenylphosphonium chloride hydrochloride** (**10)** was prepared with the yield of 25% using the same procedure described for compound 9.

1H NMR (400 MHz, Methanol-d4) δ 8.02 – 7.62 (m, 15H), 3.52 – 3.38 (m, 4H), 3.02 (s, 3H), 1.78 – 1.51 (m, 6H), 1.46 – 1.25 (m, 2H).

13C NMR (101 MHz, Methanol-d4) δ 159.30, 158.91, 134.88 (d, J = 3.0 Hz), 133.43 (d, J = 10.0 Hz), 130.15 (d, J = 12.6 Hz), 118.58 (d, J = 86.3 Hz), 49.71, 29.95 (d, J = 16.4 Hz), 26.79 (2C), 25.48, 22.14 (d, J = 4.3 Hz), 21.26 (d, J = 51.1 Hz).

IR (KBr pellet): ν=3311, 3160, 2926, 2853, 1636, 1533, 1507, 1438, 1398, 1337, 1162, 1113, 996, 784, 723, 691.

HRMS calculated for C27H35N5P: 460.26246, found: 460.26258.

**High resolution respirometry**

Cells were trypsinized, washed with PBS, resuspended in Mir05 medium (0.5 mM EGTA, 3 mM MgCl2, 60 mM K-lactobionate, 20 mM taurine, 10 mM KH2PO4, 110 mM sucrose, 1 g/l essentially fatty acid-free bovine serum albumin, 20 mM Hepes, pH 7.1 at 30 °C) and transferred to the chamber of Oxygraph-2k instrument (Oroboros). Respiration measurements were performed at 37 °C. After closing the chamber, routine respiration on intracellular substrates was recorded. In order to allow the access of exogenously added substrates, cellular plasma membrane was permeabilized with 10 µg digitonin per million cells. NADH-linked respiration was determined in the presence of 10 mM glutamate, 2 mM malate, 3 mM ADP and 10 µM cytochrome c. Complex II- or glycerol-3-phosphate dehydrogenase (G3PDH)-mediated respiration was assessed by adding 10 mM succinate or glycerol 3-phosphate, respectively, 3 mM ADP and 10 µM cytochrome c together with a CI inhibitor (0.5 µM rotenone). Concentration dependency of respiration inhibition was determined by stepwise addition of the tested compound. Uncoupled state was achieved by CCCP titration to obtain the maximal respiratory rate. Antimycin A (2.5 μM) was added at the end of each measurement to inhibit ETC and the residual oxygen consumption after antimycin A addition was subtracted from all results to obtain mitochondria-specific rates.

**Flow cytometric analysis of cell cycle**

For cell cycle analysis, PANC-1 cells were seeded in 100 mm dishes and were left to attach overnight. Cells were treated with norMitoMet or vehicle for 48 hours. Collected cells were fixed with 70% ethanol for at least 30 min at 4 °C. Fixed cells were washed with PBS and re-suspended in PBS containing 25 µg/ml propidium iodide and 100 µg/ml RNAse A. After 30 min at room temperature, the fluorescence signal was detected with LSRFortessa (BD Biosciences). The data were analysed using Cell cycle platform of the FlowJo 10 software.

Live G0 cell cycle analysis was performed using Pyronin Y and Hoechst staining. PANC-1 cells were seeded in 12-well plates and allowed to attach overnight. After 48-h incubation with norMitoMet or vehicle, cells were collected, re-suspended in 200 μl of medium and incubated with 32 µM Hoechst 33342 at 37 °C and 5% CO2 for 40 minutes. 15 minutes before measurement, 1.15 µM Pyronin Y was added. The level of fluorescence was assessed by flow cytometry (LSRFortessa, BD Biosciences).

**Intracellular ATP quantification**

ATP content was determined in PANC-1 cells cultivated in media with decreased glucose concentration (1 g/l) using CellTiter-Glo luminescent assay (Promega) in 96-well plate format. NorMitoMet and metformin were pre-applied for 24 hours. The data were normalized to the protein content of the cell lysates from a duplicate plate.
