# Supplementary material for: Mitochondrial Targeting of Metformin Enhances Its Activity against Pancreatic Cancer
Source: Oxford University Press journal article supplement (doi:10.1158/1535-7163.mct-15-1021), 2016-10-07
Supplement: 15357163mct151021-sup-160318_2_supp_3643458_gcjcbb.doc [file 15357163mct151021-sup-160318_2_supp_3643458_gcjcbb.doc]

**Supplementary tables**

**Table S1**

**Table S2**

24 h incubation time

|  | **IC50 (µM)** | | |
| --- | --- | --- | --- |
| **Cell line** | **Metformin CV** | **norMitoMet CV** | **norMitoMet xCell** |
| **PANC-1** | 34889 ± 4209 | 13.66 ± 2.25 | 5.77 ± 0.93 |
| **MiaPaCa-2** | 30714 ± 2557 | 11.30 ± 1.63 | 15.48 ± 2.24 |
| **PaTu 8902** | ˃ 50000 | 27.8 ± 5.12 | 18.25 ± 2.70 |
| **BxPC-3** | 20236 ± 2748 | 71.23 ± 16.16 | 55.50 ± 10.70 |
| **AsPC-1** | 22250 ± 2708 | 92.45 ± 9.61 | n.d. |
| **BJ cells** | ˃ 50000 | 71.06 ± 13.24 | 58.43 ± 4.29 |

48 h incubation time

|  | **IC50 (µM)** | | |
| --- | --- | --- | --- |
| **Cell line** | **Metformin CV** | **norMitoMet CV** | **norMitoMet xCell** |
| **PANC-1** | 13689 ± 1982 | 0.92 ± 0.11 | 0.99 ± 0.26 |
| **MiaPaCa-2** | 13376 ± 1725 | 0.82 ± 0.06 | 2.59 ± 0.18 |
| **PaTu 8902** | 18112 ± 939 | 2.33 ± 0.50 | 4.26 ± 0.51 |
| **BxPC-3** | 8327 ± 861 | 20.00 ± 3.64 | 28.80 ± 4.92 |
| **AsPC-1** | 13982 ± 1837 | 17.14 ± 0.81 | n.d. |
| **BJ cells** | 22540 ± 1328 | 13.16 ± 2.64 | 25.23 ± 3.57 |
